# Supplementary material
Source: ML conference proceedings conference paper supplement (https://proceedings.mlr.press/v80/garcia18a.html)
Supplement: Supplementary file 1 [file garcia18a-supp.pdf]

Supplementary material:  
Structured Output Learning with Abstention :  
application to Accurate Opinion Prediction

## 1 Proof of theorem 1

We aim at minimizing the risk of predictor  $(h, r)$  based on an estimate  $\hat{g}$  of the conditional density  $\mathbb{E}_{y|x}\psi_{wa}(y)$ :

$$(h(x), r(x)) = \arg \min_{(y_h, y_r) \in \mathcal{Y}^{H,R}} \langle C\psi_a(y_h, y_r), \hat{g}(x) \rangle,$$

and the corresponding risk is given by :

$$\mathcal{R}(h, r) = \mathbb{E}_x \langle C\psi_a(h(x), r(x)), \mathbb{E}_{y|x}\psi_{wa}(y) \rangle.$$

The optimal predictor  $(h^*, r^*)$  is the one which is based on the estimate  $\hat{g} = \mathbb{E}_{y|x}\psi_{wa}(y)$  which minimized the surrogate risk  $\mathcal{L}$  :

$$h^*(x), r^*(x) = \arg \min_{(y_h, y_r) \in \mathcal{Y}^{H,R}} \langle C\psi_a(y_h, y_r), \mathbb{E}_{y|x}\psi_{wa}(y) \rangle,$$

and the corresponding risk of the optimal predictor is :

$$\mathcal{R}(h^*, r^*) = \mathbb{E}_x \langle C\psi_a(h^*(x), r^*(x)), \mathbb{E}_{y|x}\psi_{wa}(y) \rangle.$$

Suppose that we have first solved the learning step and we have computed an estimate  $\hat{g}(x)$ , we have :

$$\begin{aligned} \mathcal{R}(h, r) - \mathcal{R}(h^*, r^*) &= \mathbb{E}_x \langle C[\psi_a(h(x), r(x)) - \psi_a(h^*(x), r^*(x))], \mathbb{E}_{y|x}\psi_{wa}(y) \rangle \\ &= \mathbb{E}_x \langle C\psi_a(h(x), r(x))(\mathbb{E}_{y|x}[\psi_{wa}(y)] - \hat{g}(x)) \rangle \\ &\quad + \mathbb{E}_x \langle C\psi_a(h(x), r(x)), \hat{g}(x) \rangle \\ &\quad - \mathbb{E}_x \langle C\psi_a(h^*(x), r^*(x)), \mathbb{E}_{y|x}\psi_{wa}(y) \rangle. \end{aligned}$$

The first term can be bounded by taking the supremum over  $\mathcal{Y}^{H,R}$  of the possible predictions :

$$\begin{aligned} &\mathbb{E}_x \langle C\psi_a(h(x), r(x)), (\mathbb{E}_{y|x}[\psi_{wa}(y)] - \hat{g}(x)) \rangle \\ &\leq \mathbb{E}_x \left( \sup_{(y_h, y_r) \in \mathcal{Y}^{H,R}} |\langle C\psi_a(y_h, y_r), (\hat{g}(x) - \mathbb{E}_{y|x}[\psi_{wa}(y)]) \rangle| \right). \end{aligned}$$

The second and third term can be rewritten using the definition of the predictors :

$$\begin{aligned}\langle C\psi_a(h(x), r(x)), \hat{g}(x) \rangle &= \inf_{(y_h, y_r) \in \mathcal{Y}^{H,R}} \langle C\psi_a(y_h, y_r), \hat{g}(x) \rangle \\ \langle C\psi_a(h^*(x), r^*(x)), \mathbb{E}_{y|x} \psi_{wa}(y) \rangle &= \inf_{(y_h, y_r) \in \mathcal{Y}^{H,R}} \langle C\psi_a(y_h, y_r), E_{y|x} \psi_{wa}(y) \rangle.\end{aligned}$$

The two terms can then be combined :

$$\begin{aligned}\inf_{(y_h, y_r) \in \mathcal{Y}^{H,R}} \langle C\psi_a(y_h, y_r), \hat{g}(x) \rangle - \inf_{(y_h, y_r) \in \mathcal{Y}^{H,R}} \langle C\psi_a(y_h, y_r), E_{y|x} \psi_{wa}(y) \rangle \\ \leq \sup_{(y_h, y_r) \in \mathcal{Y}^{H,R}} |\langle C\psi_a(y_h, y_r), (\hat{g}(x) - E_{y|x} \psi_{wa}(y)) \rangle|.\end{aligned}$$

Which gives the same term as above. By combining the results :

$$\begin{aligned}\mathcal{R}(h, r) - \mathcal{R}(h^*, r^*) &\leq 2\mathbb{E}_x \left( \sup_{(y_h, y_r) \in \mathcal{Y}^{H,R}} |\langle C\psi_a(y_h, y_r), (\hat{g}(x) - E_{y|x} \psi_{wa}(y)) \rangle| \right) \\ &\leq 2\mathbb{E}_x \left( \sup_{(y_h, y_r) \in \mathcal{Y}^{H,R}} \|C\psi_a(y_h, y_r)\|_{\mathbb{R}^q} \|(\hat{g}(x) - E_{y|x} \psi_{wa}(y))\|_{\mathbb{R}^q} \right) \\ &\leq 2 \sup_{(y_h, y_r) \in \mathcal{Y}^{H,R}} \|\psi_a(y_h, y_r)\|_{\mathbb{R}^p} \cdot \|C\| \cdot \mathbb{E}_x \left( \|(\hat{g}(x) - E_{y|x} \psi_{wa}(y))\|_{\mathbb{R}^q} \right) \\ &\leq 2 \sup_{(y_h, y_r) \in \mathcal{Y}^{H,R}} \|\psi_a(y_h, y_r)\|_{\mathbb{R}^p} \cdot \|C\| \cdot \sqrt{\mathbb{E}_x \left( \|(\hat{g}(x) - E_{y|x} \psi_{wa}(y))\|_{\mathbb{R}^q}^2 \right)}.\end{aligned}$$

Where  $\|C\| = \sup_{x \in \mathbb{R}^p, \|x\| \leq 1} \|Cx\|_{\mathbb{R}^q}$  is the operator norm and the last line is obtained using Jensen inequality.

Finally we expand the form under the square root :

$$\begin{aligned}\mathbb{E}_x [\|(\hat{g}(x) - E_{y|x} \psi_{wa}(y))\|_{\mathbb{R}^q}^2] &= \mathbb{E}_x \|\hat{g}(x)\|_{\mathbb{R}^q}^2 + \|E_{y|x} \psi_{wa}(y)\|_{\mathbb{R}^q}^2 - 2\langle \hat{g}(x), E_{y|x} \psi_{wa}(y) \rangle \\ &= \mathbb{E}_x \|\hat{g}(x)\|_{\mathbb{R}^q}^2 - \|E_{y|x} \psi_{wa}(y)\|_{\mathbb{R}^q}^2 + 2\langle E_{y|x} \psi_{wa}(y), E_{y|x} \psi_{wa}(y) \rangle \\ &\quad - 2\langle \hat{g}(x), E_{y|x} \psi_{wa}(y) \rangle + \mathbb{E}_{x,y} \|\psi_{wa}(y)\|_{\mathbb{R}^q}^2 - \mathbb{E}_{x,y} \|E_{y|x} \psi_{wa}(y)\|_{\mathbb{R}^q}^2 \\ &= \mathbb{E}_x \|\hat{g}(x)\|_{\mathbb{R}^q}^2 + \mathbb{E}_{x,y} \|\psi_{wa}(y)\|_{\mathbb{R}^q}^2 - 2\mathbb{E}_{x,y} \langle \hat{g}(x), \psi_{wa}(y) \rangle \\ &\quad - (\|E_{y|x} \psi_{wa}(y)\|_{\mathbb{R}^q}^2 + \|\psi_{wa}(y)\|_{\mathbb{R}^q}^2 - 2\mathbb{E}_{x,y} \langle E_{y|x} \psi_{wa}(y), \psi_{wa}(y) \rangle) \\ &= \mathbb{E}_{x,y} \|\hat{g}(x) - \psi_{wa}(y)\|_{\mathbb{R}^q}^2 - \mathbb{E}_{x,y} \|E_{y|x} \psi_{wa}(y) - \psi_{wa}(y)\|_{\mathbb{R}^q}^2.\end{aligned}$$

Which is equal to  $\mathcal{L}(\hat{g}) - \mathcal{L}(E_{y|x} \psi_{wa})$ .

## 2 Canonical form for some examples of the abstention aware loss

### 2.1 Canonical form for the $\Delta_{bin}$ loss

Let us consider the binary classification with a reject option loss :

$$\Delta_a^{bin}(h(x), r(x), y) = \begin{cases} 1 & \text{if } y \neq h(x) \text{ and } r(x) = 1 \\ 0 & \text{if } y = h(x) \text{ and } r(x) = 1 \\ c & \text{if } r(x) = 0 \end{cases},$$

It can also be rewritten as a function of the binary variables :

$$\begin{aligned} \Delta_a^{bin}(h(x), r(x), y) &= r(x)[1 - (h(x) - y)^2] + (1 - r(x))c \\ &= r(x)[1 - h(x) - y + 2h(x)y] + (1 - r(x))c \\ &= y(h(x)r(x)) + (1 - y)(1 - h(x))r(x) + (y + (1 - y))c(1 - r(x)). \end{aligned}$$

Which corresponds to the parameterization proposed in the article.

### 2.2 Canonical form for the $\Delta_H$ loss

Let us consider the hierarchical loss :

$$\Delta_H(h(x), r(x), y) = \sum_{i=1}^d c_i 1_{h(x)_i \neq y_i} 1_{h(x)_{p(i)} = y_{p(i)}}.$$

It is defined on objects that respect the hierarchical condition :

$$\forall i \in \{1, \dots, d\}, \forall y \in \{0, 1\}^d \quad y_i \leq y_{p(i)},$$

under the hypothesis of a binary vector, the loss can be rewritten :

$$\begin{aligned} \Delta_H(h(x), r(x), y) &= \sum_{i=1}^d c_i (h(x)_i - y_i)^2 (1 - (h(x)_{p(i)} - y_{p(i)}))^2 \\ &= \sum_{i=1}^d c_i (h(x)_i + y_i - 2h(x)_i y_i) (1 - h(x)_{p(i)} - y_{p(i)} + 2h(x)_{p(i)} y_{p(i)}). \end{aligned}$$

Where the second line has been obtained using the fact that for binary variables,  $e = e^2$ . Due to the hierarchical constraint, we also have  $y_i y_{p(i)} = y_i$  and  $h(x)_i h(x)_{p(i)} = h(x)_i$  :

$$\Delta_H(h(x), r(x), y) = \sum_{i=1}^d c_i (h(x)_i (y_{p(i)} - 2y_i) + h(x)_{p(i)} y_i).$$

Which corresponds to the parameterization proposed in the article.

### 2.3 Canonical form for the $\Delta_{Ha}$ loss

See section 4 of the supplementary material.

## 3 Proof of theorem 2

Let us recall the problem to solve :

$$\arg \min_{(y_h, y_r) \in \mathcal{Y}^{H,R}} \langle \psi_a(y_h, y_r, \psi_x), \psi_x \rangle,$$

Using the additional hypothesis over  $\psi_a$  we obtain the problem :

$$\hat{h}(x), \hat{r}(x) = \arg \min_{(y_h, y_r) \in \mathcal{Y}^{H,R}} (y_h^T, y_r^T, (y_h \otimes y_r)^T) M^T \psi_x.$$

Where  $\otimes$  is the Kronecker product between 2 vectors. This problem can be transformed into the constrained optimization problem :

$$\begin{aligned} \hat{h}(x), \hat{r}(x) = \arg \min_{(y_h, y_r) \in \mathcal{Y}^{H,R}} & (y_h^T, y_r^T, c^T) M^T \psi_x. \\ \text{s.t. } & (c = y_h \otimes y_r) \end{aligned}$$

Let us show that the constraint  $c = y_h \otimes y_r$  can be replaced by a set of linear constraints when  $h(x)$  and  $r(x)$  are two binary vectors:

### 3.1 Constraints on the $c$ vector

The linearisation of the constraint relies on the following result :

**Proposition 1.** *Let  $x$  and  $y$  be 2 binary variables and  $e$  the binary variables defined by the formula  $e = x \cdot y$  where  $\cdot$  denotes the logical AND :  $e = 1$  if  $x = 1$  and  $y = 1$  and 0 else. Then the following holds :*

$$e = x \cdot y \iff \begin{cases} e \leq x \\ e \leq y \\ e \geq x + y - 1 \\ e \geq 0 \end{cases} . \quad (1)$$

This representation can be used to rewrite the constraints on the  $c$  vector.

By definition of the Kronecker product :  $y_h \otimes y_r = \begin{pmatrix} y_{h,1}y_r \\ y_{h,2}y_r \\ \vdots \\ y_{h,d}y_r \end{pmatrix}$  where  $y_{h,i}$  is the  $i_{\text{th}}$  component of  $y_h$ .

We write each inequality of (1) as a linear matrix inequality :

$$\begin{aligned}
c &\leq A_{h,1}y_h \\
c &\leq A_{r,1}y_r \\
c &\geq A_{h,2}y_h + A_{r,2}y_r + b_1 \\
c &\geq 0.
\end{aligned}$$

All these inequality can be merged in a single one :

$$A_{\text{constraints } c} \begin{pmatrix} y_h \\ y_r \\ c \end{pmatrix} \leq b_{\text{constraints } c},$$

$$\text{where } A_{\text{constraints } c} = \begin{pmatrix} -I_d & 0_d & I_d & 0_d & 0_d & \cdots & 0_d \\ -I_d & 0_d & 0_d & I_d & 0_d & \cdots & 0_d \\ \vdots & \vdots & \ddots & \ddots & \ddots & \ddots & \vdots \\ -I_d & 0_d & \cdots & 0_d & \cdots & \cdots & I_d \\ 0_d & -V_1 & I_d & 0_d & 0_d & \cdots & 0_d \\ 0_d & -V_2 & 0_d & I_d & 0_d & \cdots & 0_d \\ \vdots & \vdots & \ddots & \ddots & \ddots & \ddots & \vdots \\ 0_d & -V_d & \cdots & 0_d & \cdots & \cdots & I_d \\ I_d & V_1 & -I_d & 0_d & 0_d & \cdots & 0_d \\ I_d & V_2 & 0_d & -I_d & 0_d & \cdots & 0_d \\ \vdots & \vdots & \ddots & \ddots & \ddots & \ddots & \vdots \\ I_d & V_d & \cdots & 0_d & \cdots & \cdots & -I_d \\ 0_d & 0_d & I_d & 0_d & \cdots & \cdots & \cdots \\ 0_d & 0_d & 0_d & I_d & 0_d & \cdots & \cdots \\ \vdots & \ddots & \ddots & \ddots & \ddots & \ddots & \vdots \\ 0_d & \ddots & \ddots & \ddots & \ddots & 0_d & I_d \end{pmatrix}$$

$$\text{and } b_{\text{constraints } c} = \begin{pmatrix} 0_{d^2,1} \\ 0_{d^2,1} \\ 1_{d^2,1} \\ 0_{d^2,1} \end{pmatrix}. \quad I_d \text{ is the } d \times d \text{ identity matrix, } 0_d \text{ the } d \times d \text{ matrix}$$

full of 0,  $0_{d^2,1}$  the  $d^2$  dimensional vector full of 0 and  $1_{d^2,1}$  the  $d^2$  dimensional vector full of 1.

$V_i$  is the  $d \times d$  matrix such that all its entries are 0 except the  $i^{\text{th}}$  which is 1. The 4 distinct blocks correspond to the 4 different constraints given in 1.

## 4 Construction of the linear program for the Hierarchical loss with abstention

Let us suppose that our prediction are the assignments of a  $d$  nodes binary tree with an abstention label  $a$ .

We recall the parameterization of our loss :

$$\begin{aligned}
\Delta_{Ha}(h(x), r(x), y) &= \sum_{i=1}^d c_{Ai} 1_{\{f_i^{h,r}=a, f_{p(i)}^{h,r}=y_{p(i)}\}} \\
&+ c_{Ac} i 1_{\{f_i^{h,r} \neq y_i, f_{p(i)}^{h,r}=a\}} \\
&+ c_i 1_{\{f_i^{h,r} \neq y_i, f_{p(i)}^{h,r}=y_{p(i)}, f_i^{h,r} \neq a\}}.
\end{aligned}$$

With  $f^{h,r}$  a prediction function built from the pair  $(h, r) : \mathcal{X} \rightarrow \mathcal{Y}^{H,R}$  :

$$\begin{aligned}
f^{h,r}(x)^T &= [f_1^{h,r}(x), \dots, f_d^{h,r}(x)], \\
f_i^{h,r}(x) &= 1_{h(x)_i=1} 1_{r(x)_i=1} + a 1_{r(x)_i=0},
\end{aligned}$$

In what follows, we denote by  $p(i)$  the index of the parent of the  $i$  according to the underlying tree and suppose that our trees are rooted at the node of index 0 for which the label is 1 and there is no abstention.

We recall the set of constraints we used to define  $\mathcal{Y}^{H,R}$  for the Ha loss :

- Abstention at 2 consecutive nodes is forbidden :  $\forall i \in \{1, \dots, d\} r(x)_i + r(x)_{p(i)} \leq 1$ .
- A node can be set to one only if its parent is set to 1 or if the predictor abstained itself from predicting it :  $h(x)_i r(x)_{p(i)} \leq h(x)_{p(i)} r(x)_{p(i)}$ .

Since  $h(x)$  and  $r(x)$  are both binary vectors, one can rewrite the loss as a function of these predictions :

$$\begin{aligned}
\Delta_{Ha}(h(x), r(x), y) &= \sum_{i=1}^n c_i (h(x)_i - y_i)^2 [1 - (h(x)_{p(i)} - y_{p(i)})^2] r(x)_i r(x)_{p(i)} \\
&+ c_{Ai} (1 - r(x)_i) [1 - (h(x)_{p(i)} - y_{p(i)})^2] \\
&+ c_{Ac} i (h(x)_i - y_i)^2 (1 - r(x)_{p(i)}).
\end{aligned}$$

We develop and simplify according to the fact that for any binary variable  $b$ , we have  $b^2 = b$  :

$$\begin{aligned}
\Delta_{Ha}(h(x), r(x), y) &= \sum_{i=1}^n c_i (h(x)_i + y_i - 2h(x)_i y_i) \\
&[1 - (h(x)_{p(i)} + y_{p(i)} - 2h(x)_{p(i)} y_{p(i)})] r(x)_i r(x)_{p(i)} \\
&+ c_{Ai} (1 - r(x)_i) [1 - (h(x)_{p(i)} + y_{p(i)} - 2h(x)_{p(i)} y_{p(i)})] \\
&+ c_{Ac} i (h(x)_i + y_i - 2h(x)_i y_i) (1 - r(x)_{p(i)}).
\end{aligned}$$

We take into account the known constraints :

- The hierarchical constraint can be written :  $(1 - h(x)_{p(i)}) r(x)_{p(i)} = 1 \implies h(x)_i = 0$  which leads to the equality :  $(1 - h(x)_{p(i)}) r(x)_{p(i)} h(x)_i = 0 \iff h(x)_{p(i)} h(x)_i r(x)_{p(i)} = h(x)_i r(x)_{p(i)}$ .

- The non consecutive abstention constraint implies  $r(x)_i r(x)_{p(i)} = r(x)_i + r(x)_{p(i)} - 1$ .

We treat the 3 terms of the  $l_{HA}$  loss separately as follows :

$$\Delta_{Ha}(h(x), r(x), y) = \sum_{i=1}^n c_i A_i(x) + c_{A_i} B_i(x) + c_{A_c i} C_i(x).$$

And rewrite each of this term as a linear combination of the unknown variables (corresponding to some elements of the vector  $\begin{pmatrix} h(x) \\ r(x) \\ h(x) \otimes r(x) \end{pmatrix}$ ):

**First term :**

$$\begin{aligned} A_i(x) &= (h(x)_i + y_i - 2h(x)_i y_i)(1 - h(x)_{p(i)} - y_{p(i)} + 2h(x)_{p(i)} y_{p(i)}) r(x)_i r(x)_{p(i)} \\ &= (h(x)_i(1 - 2y_i) + y_i)(h(x)_{p(i)}(2y_{p(i)} - 1) + 1 - y_{p(i)}) r(x)_i r(x)_{p(i)} \\ &= \left( h(x)_i h(x)_{p(i)}(1 - 2y_i)(2y_{p(i)} - 1) + \right. \\ &\quad \left. h(x)_i(1 - y_{p(i)})(1 - 2y_i) + h(x)_{p(i)} y_i(2y_{p(i)} - 1) + y_i(1 - y_{p(i)}) \right) r(x)_i r(x)_{p(i)} \\ &= h(x)_i h(x)_{p(i)} r(x)_{p(i)} r(x)_i (1 - 2y_i)(2y_{p(i)} - 1) + \\ &\quad h(x)_i r(x)_i r(x)_{p(i)} (1 - y_{p(i)})(1 - 2y_i) + \\ &\quad h(x)_{p(i)} r(x)_i r(x)_{p(i)} y_i (2y_{p(i)} - 1) + \\ &\quad r(x)_i r(x)_{p(i)} y_i (1 - y_{p(i)}). \end{aligned}$$

Using the first constraint, we have :  $h(x)_i h(x)_{p(i)} r(x)_{p(i)} r(x)_i = h(x)_i r(x)_{p(i)} r(x)_i$ .  
Using this reduction and the second constraint we obtain the equation :

$$\begin{aligned}
A_i(x) &= h(x)_i r(x)_i \left( (1 - 2y_i)(2y_{p(i)} - 1) + (1 - y_{p(i)})(1 - 2y_i) \right) + \\
&\quad h(x)_i r(x)_{p(i)} \left( (1 - 2y_i)(2y_{p(i)} - 1) + (1 - y_{p(i)})(1 - 2y_i) \right) + \\
&\quad h(x)_{p(i)} r(x)_i \left( y_i(2y_{p(i)} - 1) \right) + \\
&\quad h(x)_{p(i)} r(x)_{p(i)} \left( y_i(2y_{p(i)} - 1) \right) + \\
&\quad h(x)_i \left( - (1 - 2y_i)(2y_{p(i)} - 1) - (1 - y_{p(i)})(1 - 2y_i) \right) + \\
&\quad h(x)_{p(i)} \left( y_i(1 - 2y_{p(i)}) \right) + \\
&\quad r(x)_i \left( y_i(1 - y_{p(i)}) \right) + \\
&\quad r(x)_{p(i)} \left( y_i(1 - y_{p(i)}) \right) + \\
&\quad \left( y_i(y_{p(i)} - 1) \right).
\end{aligned}$$

**Second term :**

$$\begin{aligned}
B_i(x) &= (1 - r(x)_i)(1 - h(x)_{p(i)} - y_{p(i)} + 2h(x)_{p(i)}y_{p(i)}) \\
&= h(x)_{p(i)} r(x)_i \left( 1 - 2y_{p(i)} \right) + \\
&\quad h(x)_{p(i)} \left( 2y_{p(i)} - 1 \right) + \\
&\quad r(x)_i \left( y_{p(i)} - 1 \right) + \\
&\quad \left( 1 - y_{p(i)} \right).
\end{aligned}$$

**Third term :**

$$\begin{aligned}
C_i(x) &= h(x)_i + y_i - 2h(x)_i y_i (1 - r(x)_{p(i)}) \\
&= h(x)_i r(x)_{p(i)} \left( 2y_i - 1 \right) + \\
&\quad h(x)_i \left( 1 - 2y_i \right) + \\
&\quad r(x)_{p(i)} \left( -y_i \right) + \\
&\quad \left( y_i \right).
\end{aligned}$$



### Sum of the three terms

Based on the previous results we express the loss as a linear combination of the different variables previously expressed :

$$\Delta_{Ha}(h(x), r(x), y) = \left( \sum_{i=1}^n a_{(i)}^{(1)} h(x)_i + a_{(i)}^{(2)} h(x)_i r(x)_{p(i)} + a_{(i)}^{(3)} h(x)_{p(i)} r(x)_i + a_{(i)}^{(4)} h(x)_i r(x)_i + a_{(i)}^{(5)} r(x)_i + a_{(i)}^{(6)} h(x)_{p(i)} + a_{(i)}^{(7)} r(x)_{p(i)} + a_{(i)}^{(8)} h(x)_{p(i)} r(x)_{p(i)} + a_{(i)}^{(9)} \right).$$

With the following table of correspondency  $\forall k \in \{1, \dots, d\}$ :

$$\begin{aligned} a_{(i)}^{(1)} &= -c_i((1 - 2y_i)(2y_{p(i)} - 1) + (1 - y_{p(i)})(1 - 2y_i)) + c_{A_{c_i}}(1 - 2y_i) \\ a_{(i)}^{(2)} &= c_i((1 - 2y_i)(2y_{p(i)} - 1) + (1 - y_{p(i)})(1 - 2y_i)) + c_{A_{c_i}}(2y_i - 1) \\ a_{(i)}^{(3)} &= c_i(y_i(2y_{p(i)} - 1)) + c_{A_i}(1 - 2y_{p(i)}) \\ a_{(i)}^{(4)} &= c_i((1 - 2y_i)(2y_{p(i)} - 1) + (1 - y_{p(i)})(1 - 2y_i)) \\ a_{(i)}^{(5)} &= c_i y_i(1 - y_{p(i)}) + c_{A_i}(y_{p(i)} - 1) \\ a_{(i)}^{(6)} &= c_i y_i(1 - 2y_{p(i)}) + c_{A_i}(2y_{p(i)} - 1) \\ a_{(i)}^{(7)} &= c_i y_i(1 - y_{p(i)}) - c_{A_{c_i}} y_i \\ a_{(i)}^{(8)} &= c_i y_i(2y_{p(i)} - 1) \\ a_{(i)}^{(9)} &= c_i y_i(y_{p(i)} - 1) + c_{A_i}(1 - y_{p(i)}) + c_{A_{c_i}} y_i. \end{aligned}$$

We introduce a new vector of variables  $g = \begin{pmatrix} g^{(1)} \\ g^{(2)} \\ \vdots \\ g^{(8)} \end{pmatrix}$  where each of the  $n$

dimensional vectors  $g^{(k)}$  is defined as follows :  $\forall i \in \{1, \dots, n\}$

$$\begin{aligned} g_i^{(1)} &= h_i \\ g_i^{(2)} &= h_i r_{p_i} \\ g_i^{(3)} &= h_{p_i} r_i \\ g_i^{(4)} &= h_i r_i \\ g_i^{(5)} &= r_i \\ g_i^{(6)} &= h_{p_i} \\ g_i^{(7)} &= r_{p_i} \\ g_i^{(8)} &= h_{p_i} r_{p_i}. \end{aligned}$$

The last variables are redundant since  $g_{p_i}$  and  $g_i$  are the same except at the root and leaves. Let us denote by  $A_h$  the adjacency matrix of the underlying

hierarchy and  $\forall p \in \{1, \dots, 8\}$   $y^{(p)} = \begin{pmatrix} y_1^{(p)} \\ \vdots \\ y_d^{(p)} \end{pmatrix}$  and  $a_{\bar{p}} = \begin{pmatrix} a_{\bar{p}1} \\ \vdots \\ a_{\bar{p}d} \end{pmatrix}$ . Then we have

$$\begin{aligned} y^{(6)} &= A_h y^{(1)} \\ y^{(7)} &= A_h y^{(5)} \\ y^{(8)} &= A_h y^{(4)}. \end{aligned}$$

Let us denote by  $a^{(p)} = \begin{pmatrix} a_1^{(p)} \\ a_2^{(p)} \\ \vdots \\ a_n^{(p)} \end{pmatrix}$ , one can rewrite the loss  $l(y^{(A)}, y)$  using the reduced set of variables :

$$\Delta_{Ha}(h(x), r(x), y) = \sum_{p=1}^5 \left( (a^{(p)})^T g^{(p)} \right) + (a^{(6)})^T A_h g^{(1)} + (a^{(7)})^T A_h y^{(5)} + (a^{(8)})^T A_h y^{(4)}.$$

This is a linear program by choosing the cost vector  $c$  and the variable  $g'$  :

$$c = \begin{pmatrix} a^{(1)} + A_h^T a^{(6)} \\ a^{(2)} \\ a^{(3)} \\ a^{(4)} + A_h^T a^{(8)} \\ a^{(5)} + A_h^T a^{(7)} \end{pmatrix} \quad g' = \begin{pmatrix} g^{(1)} \\ g^{(2)} \\ g^{(3)} \\ g^{(4)} \\ g^{(5)}. \end{pmatrix}$$

Leading to the reduced form :

$$l(y^{(A)}, y) = c^T g'.$$

In our applications, the abstention aware predictor we built relied on solving problems of the form :

$$\arg \min_{y^{(A)}} \sum_{k=1}^N \alpha_k(x) \Delta_{Ha}(h(x), r(x), y_k).$$

Where  $(x_k, y_k)$   $k \in \{1, \dots, N\}$  are labelled example of a  $N$  sample training set and  $(x, f^{h,r})$  correspond to the new input  $x$  for which we look for the best prediction  $f^{h,r}$ .

According to the previous results, we denote by  $c_k$  the cost vector computed from the term  $l(y^{(A)}, y_k)$  and  $\bar{c}(x) = \sum_{k=1}^n \alpha_k(x) c_k$  the full cost vector of the previous minimization problem. The minimization problem can be rewritten explicit in terms of the vector of variables  $g'$  by making the constraints between its different parts explicit :

$$\begin{aligned}
\arg \min_{y^{(A)}} \sum_{k=1}^N \alpha_k(x) \Delta_{Ha}(h(x), r(x), y_k) = & \arg \min_{g' \in \{0,1\}^{8n}} c^T g' \\
\text{subject to} & g^{(2)} = g^{(1)} \odot A_h g^{(5)}, \\
& g^{(3)} = A_h g^{(1)} \odot g^{(5)}, \\
& g^{(4)} = g^{(1)} \odot g^{(5)}, \\
& g^{(2)} \leq A_h g^{(4)}, \\
& g^{(5)} \in \mathcal{Y}_r.
\end{aligned}$$

Where  $\mathcal{Y}_r$  is the space of  $d$  dimensional binary vectors such that  $\forall y \in \mathcal{Y}_r \forall i \in \{1, \dots, d\} y_i + y_{p(i)} \leq 1$ . The 3 first constraints are given by construction of the  $g'$  vector from 2 underlying vectors  $r(x)$  and  $h(x)$ . The fourth line is the generalized hierarchical constraint :  $\forall i \in 1, \dots, n h(x)_i r(x)_{p(i)} \leq h(x)_{p(i)} r(x)_{p(i)}$ . The fifth line corresponds to the hypothesis of no 2 consecutive abstentions.

We turn this program into a canonical linear program with binary value constraints :

$$\begin{aligned}
\arg \min_g \mathcal{L}(g) = & \arg \min_{g' \in \{0,1\}^{8n}} c^T g' \\
\text{subject to} & g^{(2)} \leq g^{(1)}, \\
& g^{(2)} \leq A_h g^{(5)}, \\
& g^{(2)} \geq g^{(1)} + A_h g^{(5)} - 1, \\
& g^{(3)} \leq A_h g^{(1)}, \\
& g^{(3)} \leq g^{(5)}, \\
& g^{(3)} \geq A_h g^{(1)} + g^{(5)} - 1, \\
& g^{(4)} \leq g^{(1)}, \\
& g^{(4)} \leq g^{(5)}, \\
& g^{(4)} \geq g^{(1)} + g^{(5)} - 1, \\
& g^{(2)} \leq A_h g^{(4)}, \\
& I_d + A_h g^{(5)} \leq 1.
\end{aligned}$$

In our experiments, this integer linear program is solved using the python cylv binder to the Cbc library and directly implemented using sparse representations.

## 4.1 Hierarchical classification of MRI images

The Medical Retrieval Task of the ImageCLEF 2007 challenge provided a set of medical images aligned with a code corresponding to a class in a predefined hierarchy. A class is described by 4 values encoded as follows :

- T (Technical) : image modality
- D (Directional) : body orientation
- A (Anatomical) : body region examined
- B (Biological) : biological system examined

In our experiments we focus on the *D* and *A* tasks and reuse the representation proposed in [DKLD08] and freely available at the page : [http://ijs.si/DragiKocev/PhD/resources/doku.php?id=hmc\\_classification](http://ijs.si/DragiKocev/PhD/resources/doku.php?id=hmc_classification). Each dataset contains an existing train test split with 10000 labeled objects for training and 1006 for testing. The *A* task consist in predicting the assignment of a 96 nodes binary tree of maximal depth 3 ( an example of label at depth 3 is : upper extremity / arm  $\rightarrow$  hand  $\rightarrow$  finger). The *D* task consist in predicting the assignment of a 46 nodes binary tree of maximal depth 3 ( an example of label at depth 3 is : sagittal  $\rightarrow$  lateral, right-left  $\rightarrow$  inspiration). The complete hierarchy is described in [LSK<sup>+</sup>03]

The table below contains the results in terms of Hamming Loss for the problem of hierarchical classification.

| Method                    | Hamming loss |
|---------------------------|--------------|
| H Regression              | 0.0189       |
| Depth weighted Regression | 0.0193       |
| Uniform Regression        | 0.0218       |
| Binary SVC                | 0.0197       |

Table 1: Results on the ImageCLEF2007d task

| Method                    | Hamming loss |
|---------------------------|--------------|
| H Regression              | 0.0065       |
| Depth weighted Regression | 0.0068       |
| Uniform Regression        | 0.0102       |
| Binary SVC                | 0.0071       |

Table 2: Results on the ImageCLEF2007a task

We compare our method (H regression) using the sibling weighted scheme described in the article against our same method (Uniform regression) with a uniform weighted scheme ( $c_i = 1 \forall i \in \{1, \dots, d\}$ ), a depth weighted scheme ( $c_i = \frac{c_p(i)}{N_d} \forall i \in \{1, \dots, d\}$  where  $N_d$  is the number of nodes at depth  $d$  i.e. separated from the root by  $d+1$  nodes) and against the binary relevance Support Vector Classifier approach (binary SVC) which consist in training one SVM classifier for each node and applying the Hierarchical condition in a second time

by switching to 0 all the nodes which for which the parent node has the label 0. We used the gaussian kernel for the input data in all 3 methods and tuned the hyperparameters by 5 folds cross validation and report the results on the available test set.

These results illustrate the choice of the sibling weighted scheme for the H loss since it retrieve the best results. Moreover, taking the structured representation into account is shown to improve the results over the Binary SVC approach on both tasks.

## References

- [DKLD08] Ivica Dimitrovski, Dragi Kocev, Suzana Loskovska, and Sašo Džeroski. Hierchical annotation of medical images. In *Proceedings of the 11th International Multiconference - Information Society IS 2008*, pages 174–181. IJS, Ljubljana, 2008.
- [LSK<sup>+</sup>03] Thomas Martin Lehmann, Henning Schubert, Daniel Keyzers, Michael Kohnen, and Berthold B Wein. The irma code for unique classification of medical images. In *Medical Imaging 2003: PACS and Integrated Medical Information Systems: Design and Evaluation*, volume 5033, pages 440–452. International Society for Optics and Photonics, 2003.
